# Supplementary material for: Environmental Risk Score as a New Tool to Examine Multi-Pollutants in Epidemiologic Research: An Example from the NHANES Study Using Serum Lipid Levels
Source: PubMed Central journal article supplement (PMC4047033; doi:10.1371/journal.pone.0098632), 2014-06-05
Supplement: pone.0098632.s005.pdf [file pone.0098632.s005.pdf]

Environmental Risk Score as a new tool to examine multi-pollutants in epidemiologic research: an example from the NHANES study using serum lipid levels

*Sung Kyun Park, Yebin Tao, John D. Meeker, Siobán D. Harlow, Bhramar Mukherjee*

Table S2. Spearman correlation coefficients between four phenotypes.

|                   | Total cholesterol | HDL    | LDL    | Triglyceride |
|-------------------|-------------------|--------|--------|--------------|
| Total cholesterol | 1                 | 0.155* | 0.856* | 0.372*       |
| HDL               |                   | 1      | -0.027 | -0.418*      |
| LDL               |                   |        | 1      | 0.148*       |
| Triglyceride      |                   |        |        | 1            |

\* $p < 0.05$ .
