# Supplementary material for: Environmental Risk Score as a New Tool to Examine Multi-Pollutants in Epidemiologic Research: An Example from the NHANES Study Using Serum Lipid Levels
Source: PubMed Central journal article supplement (PMC4047033; doi:10.1371/journal.pone.0098632), 2014-06-05
Supplement: pone.0098632.s006.pdf [file pone.0098632.s006.pdf]

Environmental Risk Score as a new tool to examine multi-pollutants in epidemiologic research: an example from the NHANES study using serum lipid levels

Sung Kyun Park, Yebin Tao, John D. Meeker, Siobán D. Harlow, Bhramar Mukherjee

Table S3. Micronutrients selected for each phenotype using Bayesian model averaging (BMA).

| Variable in NHANES                   | Name                               | Phenotype         |     |     |              |
|--------------------------------------|------------------------------------|-------------------|-----|-----|--------------|
|                                      |                                    | Total cholesterol | HDL | LDL | Triglyceride |
| SFOL                                 | Folate, serum (ng/mL)              | x                 | x   |     | x            |
| SB12                                 | Vitamin B12, serum (pg/mL)         |                   |     |     | x            |
| RBCFOL                               | Folate, RBC (ng/mL RBC)            | x                 |     | x   | x            |
| LBXMMA                               | Methylmalonic acid (μmol/L)        | x                 |     | x   |              |
| LBXRPL                               | Retinyl palmitate (μg/dL)          | x                 |     |     | x            |
| LBXRST                               | Retinyl stearate (μg/dL)           |                   | x   | x   | x            |
| LBXVIA                               | Retinol (μg/dL)                    | x                 | x   | x   | x            |
| LBXBEC                               | Trans-β-carotene (μg/dL)           | x                 | x   | x   | x            |
| LBXCBC                               | Cis-β-carotene (μg/dL)             | x                 | x   |     |              |
| LBXCRY                               | β-cryptoxanthin (μg/dL)            | x                 |     |     | x            |
| LBXLUZ                               | Combined lutein/zeaxanthin (μg/dL) | x                 | x   | x   | x            |
| LBXLYC                               | Trans-lycopene (μg/dL)             | x                 | x   | x   |              |
| LBXATC                               | α-tocopherol (μg/dL)               | x                 | x   | x   | x            |
| LBXGTC                               | γ-tocopherol (μg/dL)               | x                 | x   | x   | x            |
| Total number included for adjustment |                                    | 12                | 9   | 9   | 11           |

Note: A total of 31 micronutrient variables were considered. The variables not selected (n=17) are daidzein (URXDAZ), o-desmethylangolensin (URXDMA), equol (URXEQU), enterodiol (URXETD), enterolactone (URXETL), genistein (URXGNS), δ-tocopherol (LBXDTC), α-cryptoxanthin (LBXACY), α-carotene (LBXALC), total β-carotene (LBXBCC), cis-lycopene (LBXCLC), total lycopene (LBXLCC), cis-lutein/zeaxanthin (LBXCLZ), lutein (LBXLUT), zeaxanthin (LBXZEA), phytofluene (LBXPHF), and phytoene (LBXPHE).
