# Supplementary material for: Environmental Risk Score as a New Tool to Examine Multi-Pollutants in Epidemiologic Research: An Example from the NHANES Study Using Serum Lipid Levels
Source: PubMed Central journal article supplement (PMC4047033; doi:10.1371/journal.pone.0098632), 2014-06-05
Supplement: pone.0098632.s007.pdf [file pone.0098632.s007.pdf]

Environmental Risk Score as a new tool to examine multi-pollutants in epidemiologic research: an example from the NHANES study using serum lipid levels

*Sung Kyun Park, Yebin Tao, John D. Meeker, Siobán D. Harlow, Bhramar Mukherjee*

Table S4. Distributions of Environmental Risk Scores (ERS) (n=3847).

|                   | ERS1 <sup>a</sup> |               | ERS2 <sup>b</sup> |               |
|-------------------|-------------------|---------------|-------------------|---------------|
|                   | Mean (SD)         | Range         | Mean (SD)         | Range         |
| Total cholesterol | 0.090 (0.043)     | -0.068, 0.239 | 0.058 (0.019)     | -0.009, 0.135 |
| HDL               | 0.030 (0.057)     | -0.226, 0.205 | 0.061 (0.022)     | -0.013, 0.152 |
| LDL               | 0.088 (0.029)     | -0.059, 0.195 | 0.086 (0.027)     | -0.054, 0.183 |
| Triglyceride      | -0.445 (0.228)    | -1.278, 0.563 | -0.009 (0.082)    | -0.291, 0.339 |

HDL, high-density lipoprotein cholesterol; LDL, low-density lipoprotein cholesterol.

<sup>a</sup>ERS constructed with coefficient estimates from single-pollutant models as weights.

<sup>b</sup>ERS constructed with coefficient estimates from multi-pollutant models as weights.
